# Supplementary material for: Nonspecific luminometric assay for monitoring protein adsorption efficiency and coverage on nanoparticles
Source: Royal Society of Chemistry journal article supplement (doi:10.1039/c6nr08497d), 2017-01-01
Supplement: c6nr08497d1.pdf [file c6nr08497d1.pdf]

## Supplementary Material for:

### **Nonspecific Luminometric Assay for Monitoring Protein Adsorption Efficiency and Coverage on Nanoparticles**

*Joonas Terävä, Elina Hokkanen and Sari Pihlasalo\**

- Figure S1. Reproducibility of the TR-LRET assay for assessing degree of protein surface coverage on coated nanoparticles.
- Figure S2. Demonstration of the TR-LRET assay for monitoring protein adsorption to nanoparticles presented with primary luminescence signals.

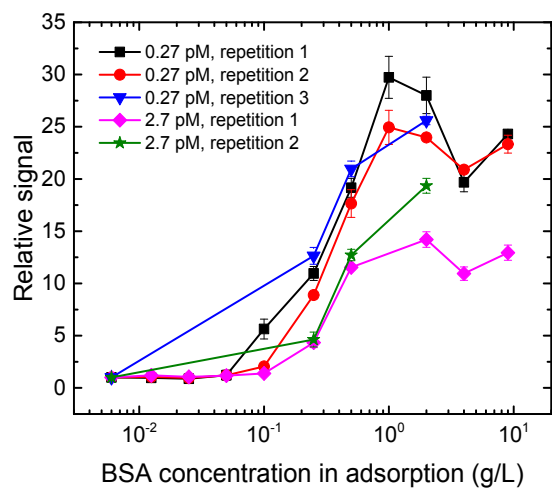

**Figure S1.** Reproducibility of the TR-LRET assay for assessing degree of protein surface coverage on coated nanoparticles measured at 0.27 and 2.7 pM concentrations of analyte nanoparticles. The relative signals were obtained by dividing the signals measured for the samples with the signals measured for the samples at zero concentration of BSA.

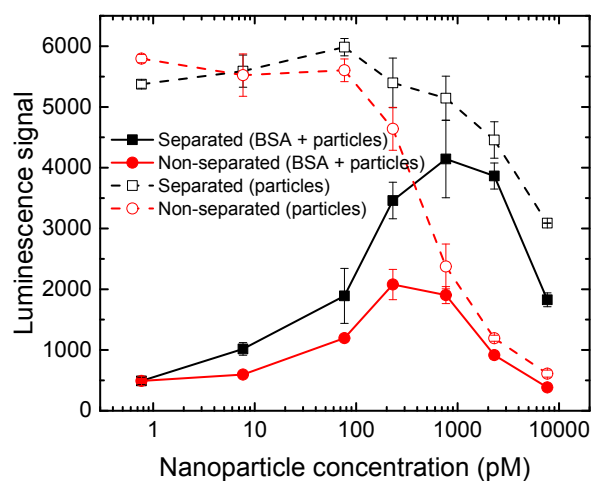

**Figure S2.** Demonstration of the TR-LRET assay for monitoring protein adsorption to nanoparticles presented with primary luminescence signals. BSA adsorption to polystyrene nanoparticles was followed at varying nanoparticle concentrations. The samples containing both BSA and studied nanoparticles or only nanoparticles were measured. The centrifugation step was performed to obtain samples with (non-separated) and without (separated) studied nanoparticles.
